# Supplementary material for: Synthesis of Novel Structural Hybrids between Aza-Heterocycles and Azelaic Acid Moiety with a Specific Activity on Osteosarcoma Cells
Source: MDPI journal article supplement (doi:10.3390/molecules25020404), 2020-01-18
Supplement: s1 [file s1]

# Synthesis of novel structural hybrids between aza-heterocycles and azelaic acid moiety with a specific activity on osteosarcoma cells

Gabriele Micheletti<sup>1\*</sup>, Natalia Calonghi<sup>2\*</sup>, Giovanna Farruggia<sup>2,3</sup>, Elena Strocchi<sup>1</sup>, Vincenzo Palmacci<sup>1</sup>, Dario Telese<sup>1</sup>, Silvia Bordoni<sup>1</sup>, Giulia Frisco<sup>2</sup>, Carla Boga<sup>1</sup>

<sup>1</sup> Department of Industrial Chemistry 'Toso Montanari', Alma Mater Studiorum Università di Bologna Viale Del Risorgimento, 4 402136 Bologna Italy; (GM), [carla.boga@unibo.it](mailto:carla.boga@unibo.it) (CB), [dario.telese2@unibo.it](mailto:dario.telese2@unibo.it) (DT), [silvia.bordoni@unibo.it](mailto:silvia.bordoni@unibo.it) (SB), [vincenzo.palmacci@studio.unibo.it](mailto:vincenzo.palmacci@studio.unibo.it); [elena.strocchi@unibo.it](mailto:elena.strocchi@unibo.it) (ES)

<sup>2</sup> Department of Pharmacy and Biotechnology, University of Bologna, Via Irnerio 48, 40126 Bologna (Italy); (NC), [giovanna.farruggia@unibo.it](mailto:giovanna.farruggia@unibo.it) (GF1), [giulia.frisco2@unibo.it](mailto:giulia.frisco2@unibo.it) (GF2)

<sup>3</sup> National Institute of Biostructures and Biosystems, Viale delle Medaglie d'Oro, 305, Rome 00136, Italy (GF)

## Supporting information

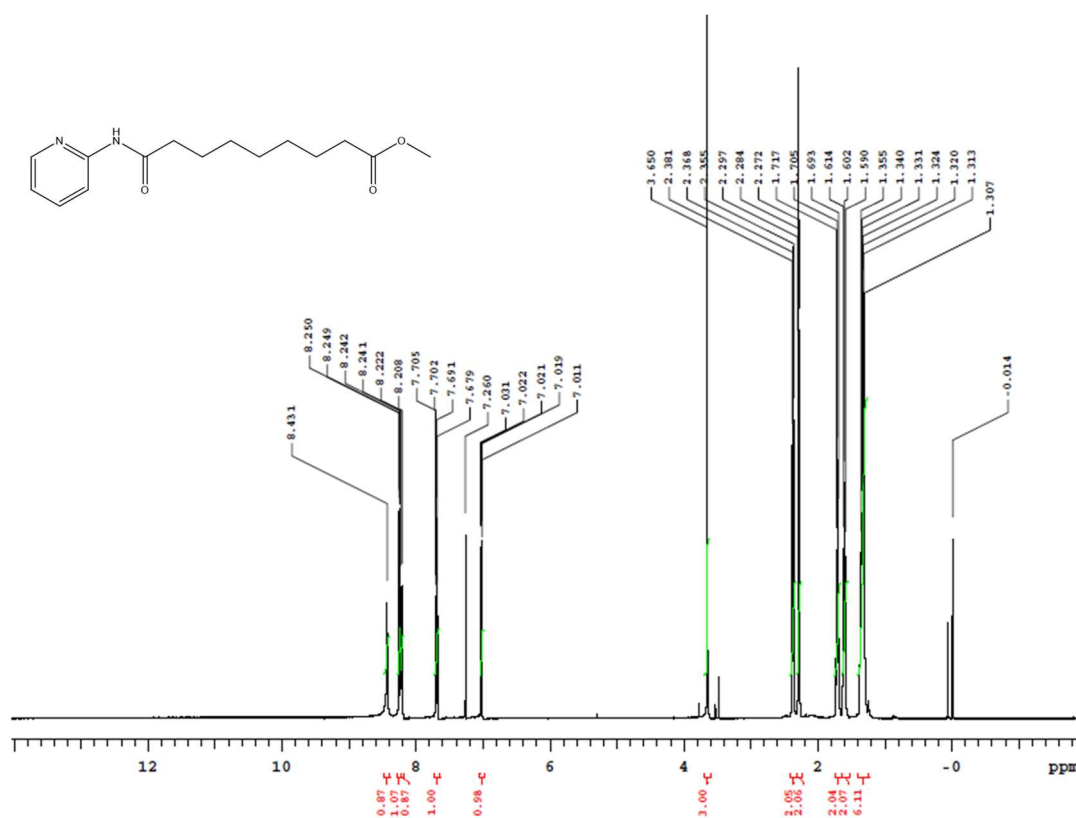

Figure S1. <sup>1</sup>H NMR spectrum (CDCl<sub>3</sub>, 600 MHz) of compound 4a

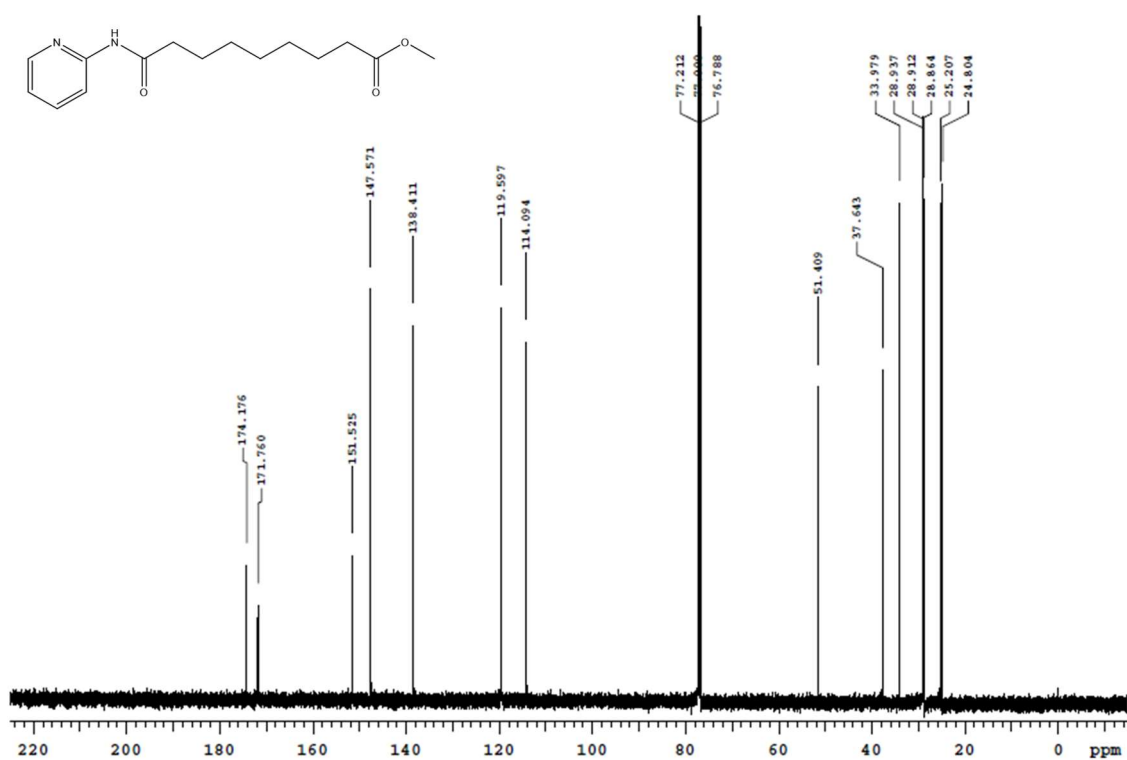

Figure S2. <sup>13</sup>CNMR spectrum (CDCl<sub>3</sub>, 150 MHz) of compound 4a

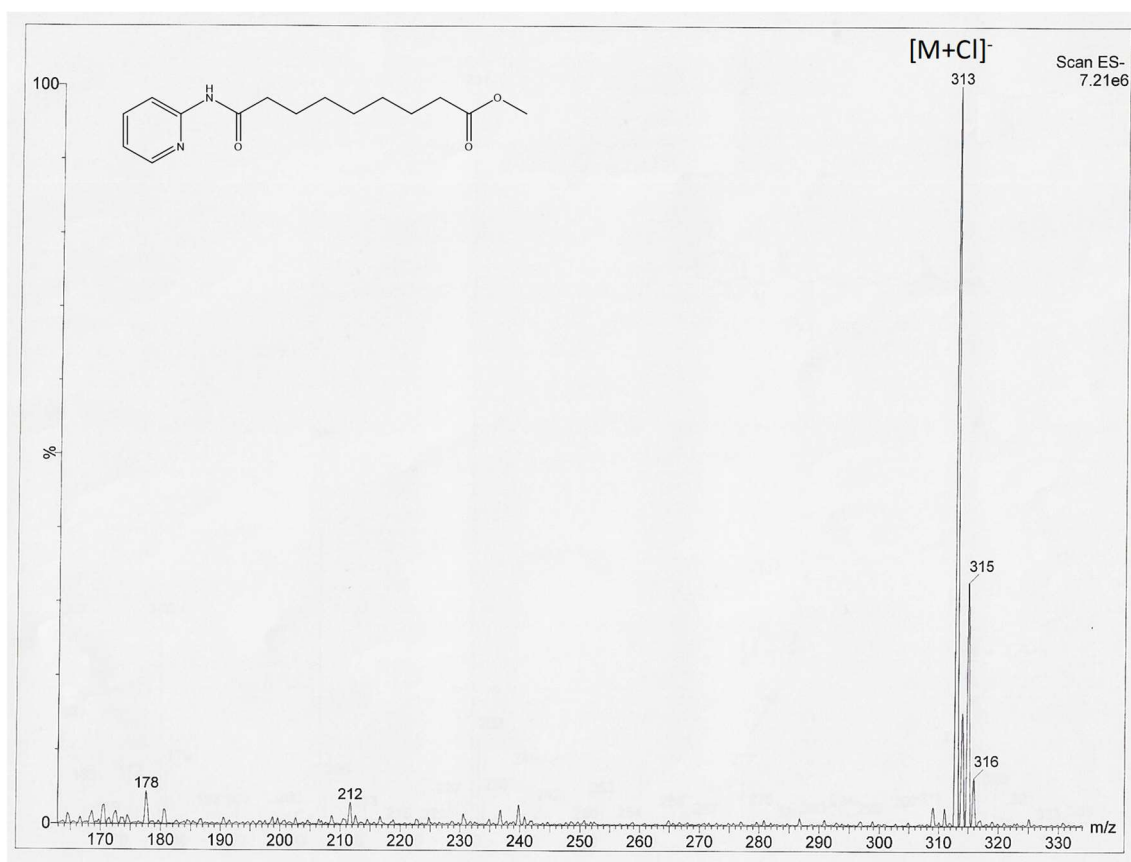

Figure S3. ESI-MS<sup>-</sup> spectrum of compound 4a

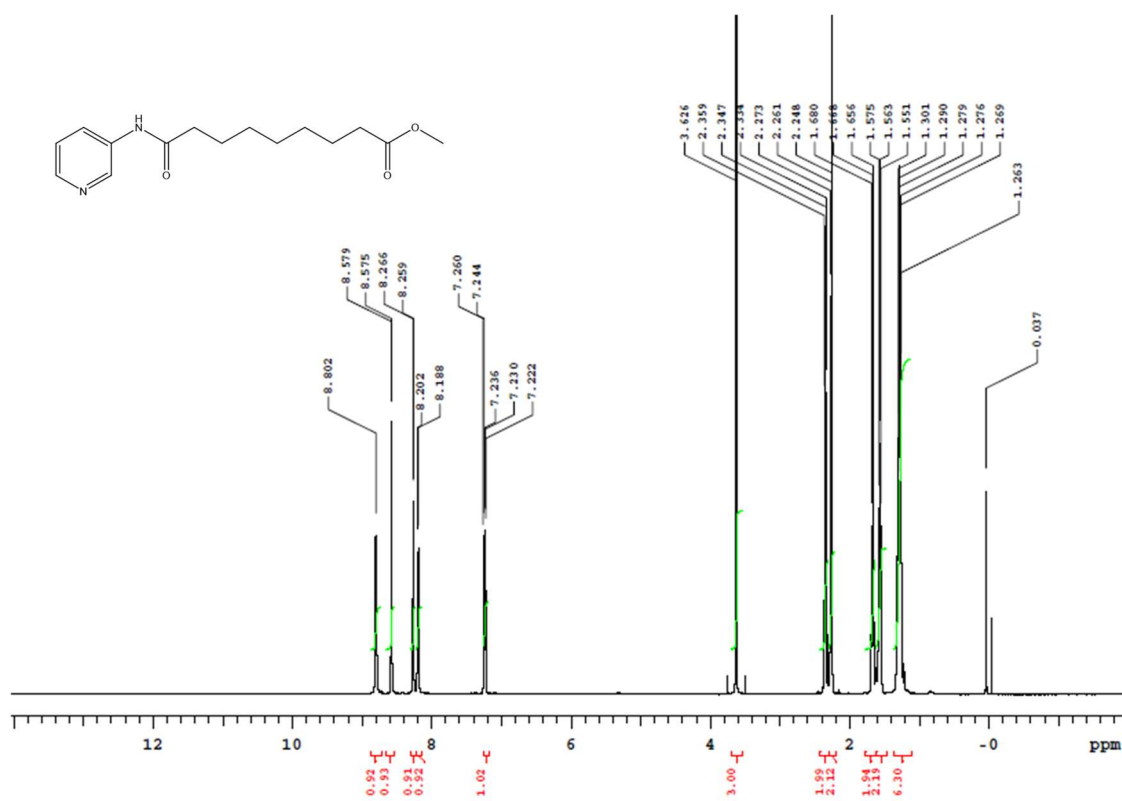

Figure S4. <sup>1</sup>H NMR spectrum (CDCl<sub>3</sub>, 600 MHz) of compound 4b

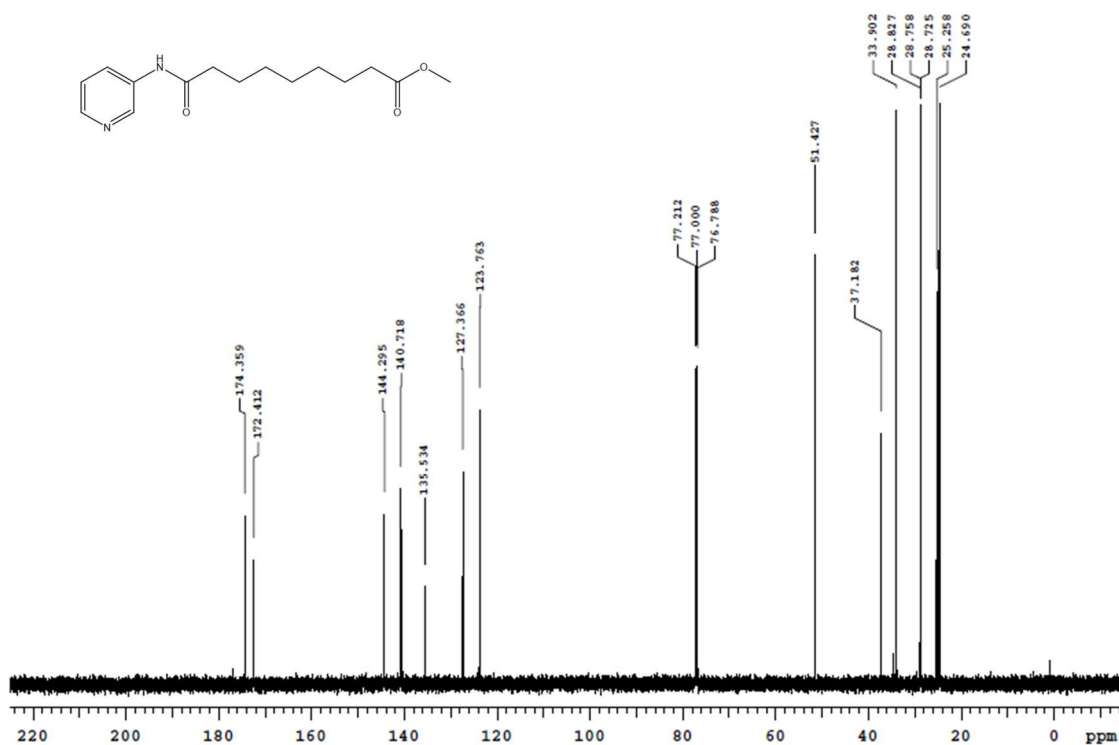

Figure S5. <sup>13</sup>C NMR spectrum (CDCl<sub>3</sub>, 150 MHz) of compound 4b

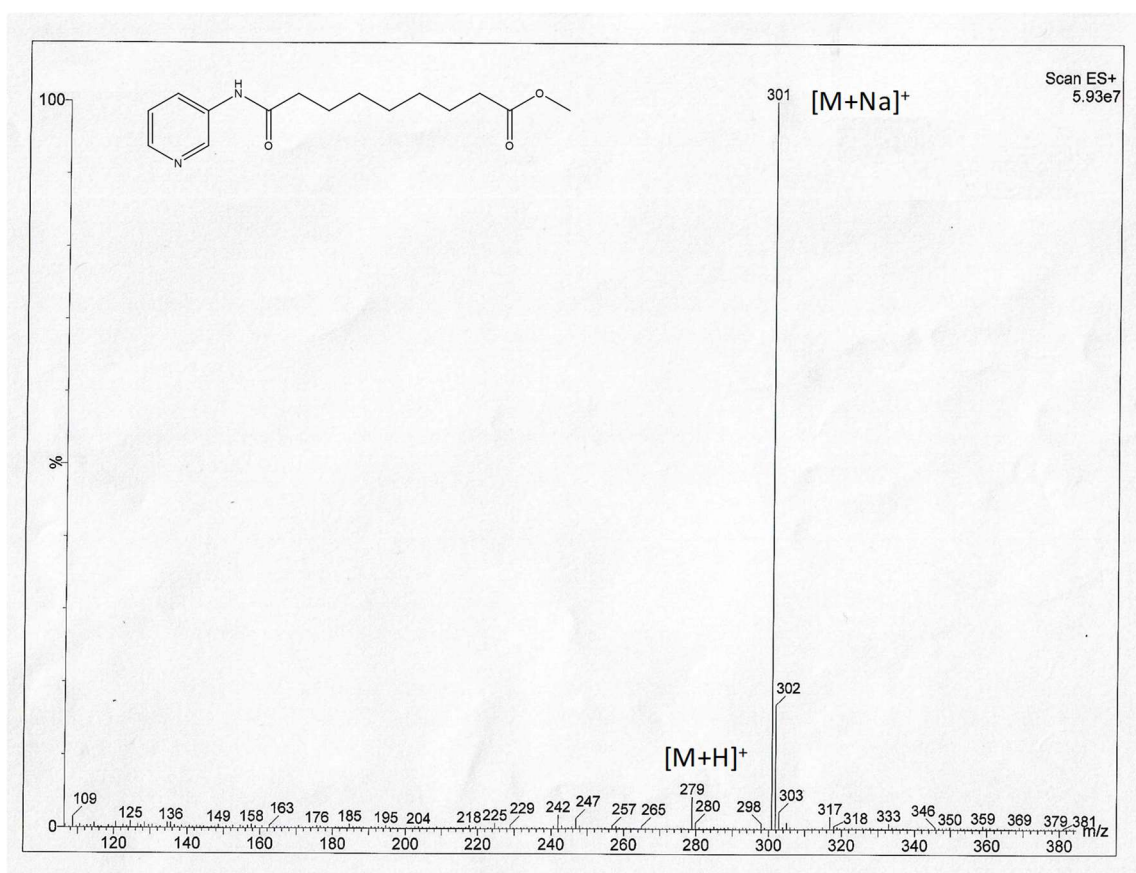

Figure S6. ESI-MS<sup>+</sup> spectrum of compound 4b

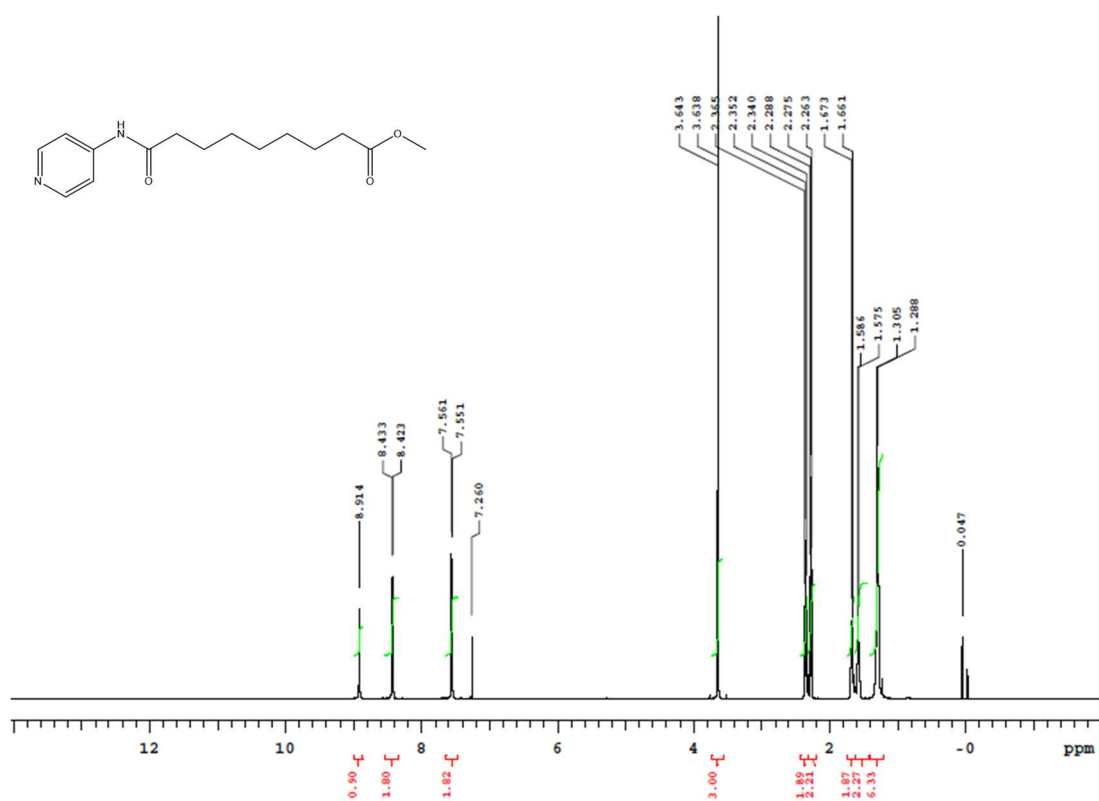

Figure S7. <sup>1</sup>H NMR spectrum (CDCl<sub>3</sub>, 600 MHz) of compound 4b

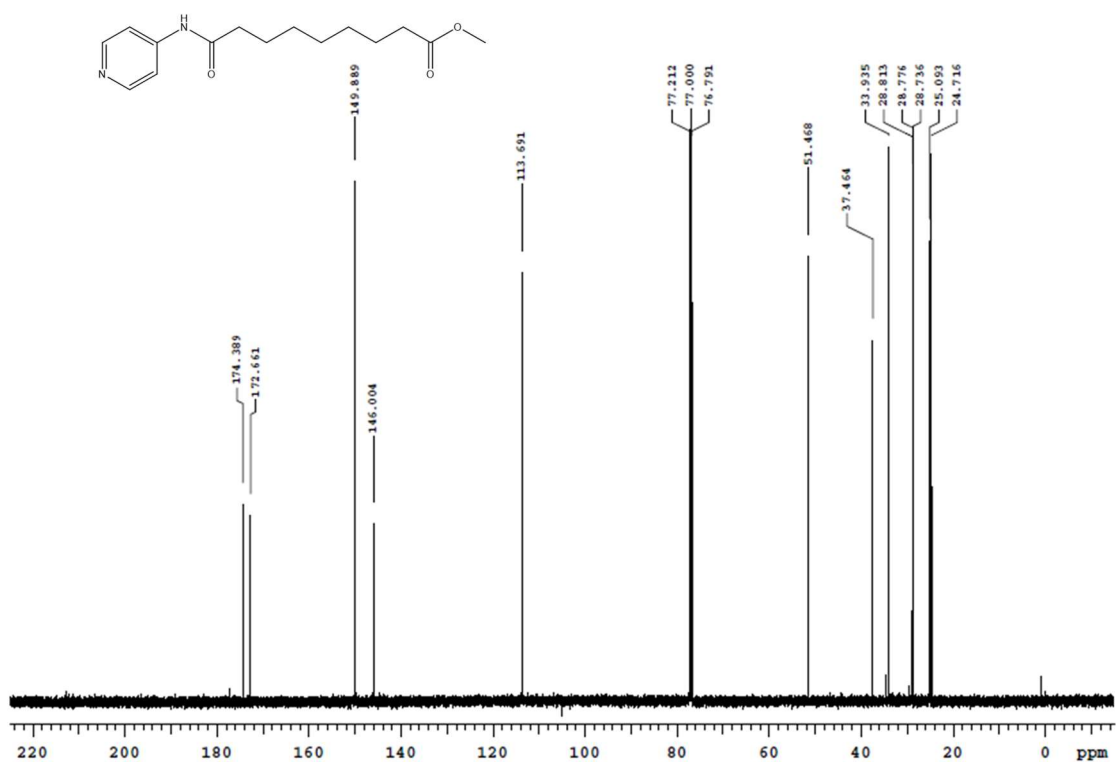

Figure S8.  $^{13}\text{C}$ NMR spectrum ( $\text{CDCl}_3$ , 150 MHz) of compound **4c**

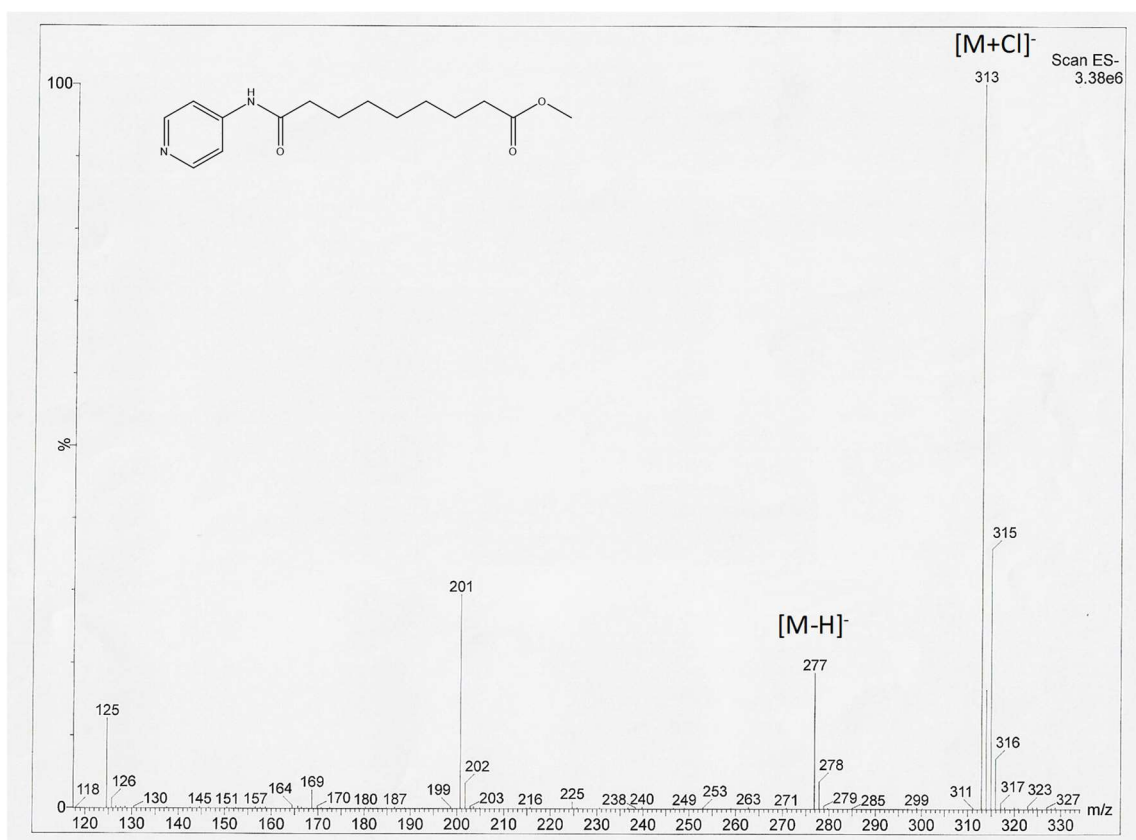

Figure S9. ESI-MS $^-$  spectrum of compound **4c**

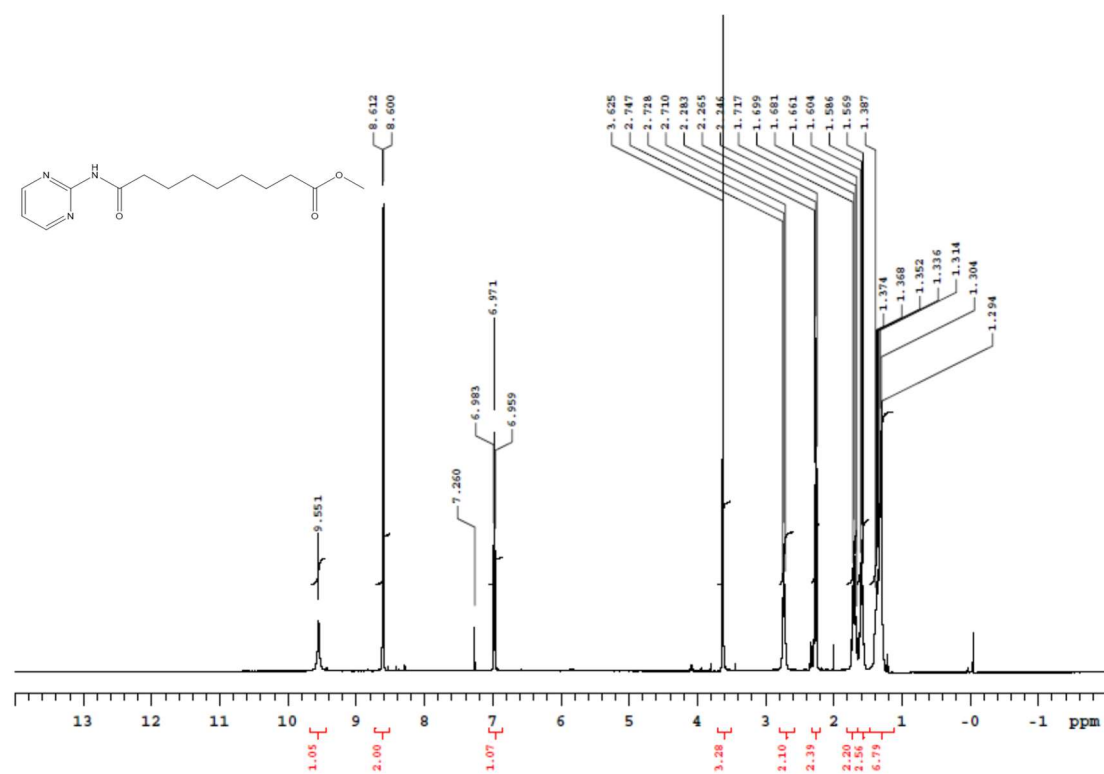

Figure S10. <sup>1</sup>H NMR spectrum (CDCl<sub>3</sub>, 400 MHz) of compound 5a

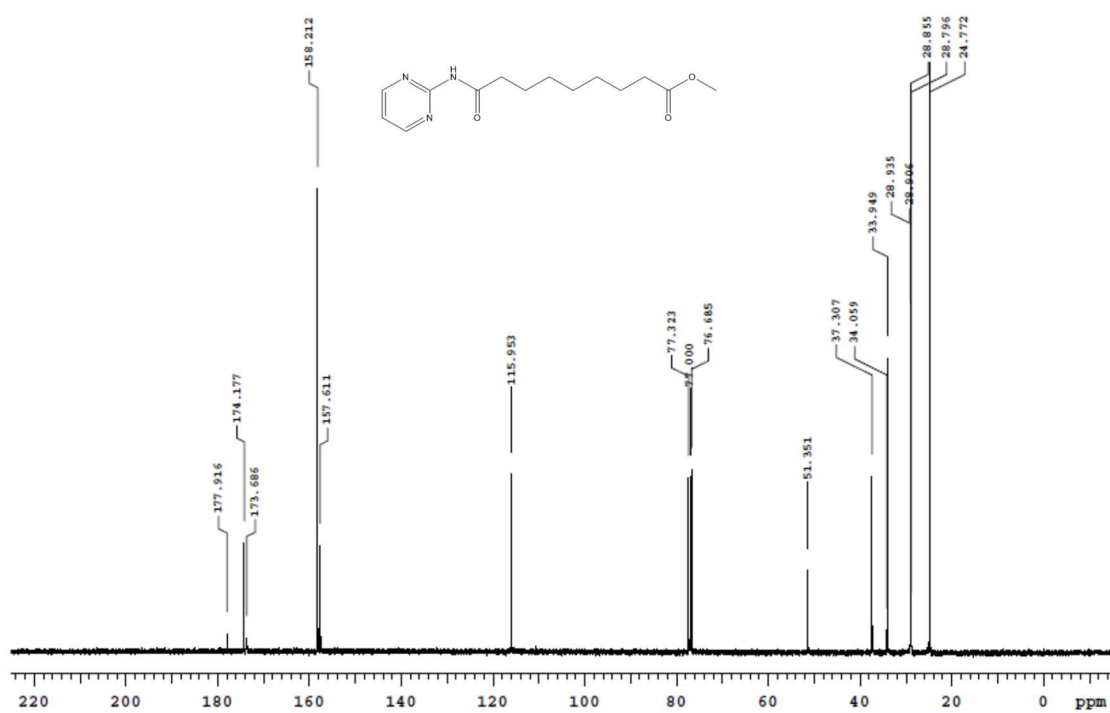

Figure S11. <sup>13</sup>C NMR spectrum (CDCl<sub>3</sub>, 100 MHz) of compound 5a

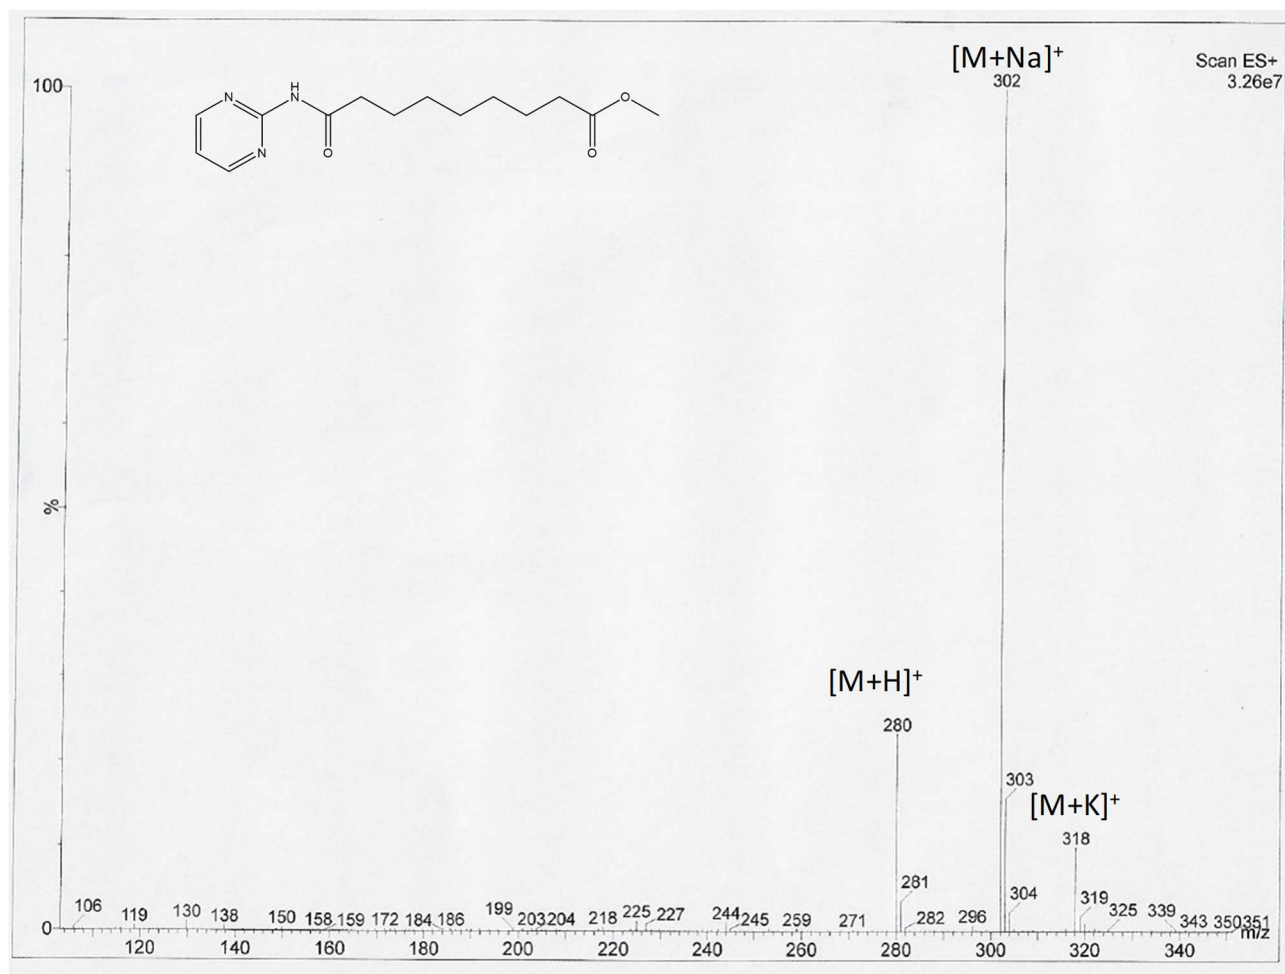

**Figure S12.** ESI-MS<sup>+</sup> spectrum of compound 5a

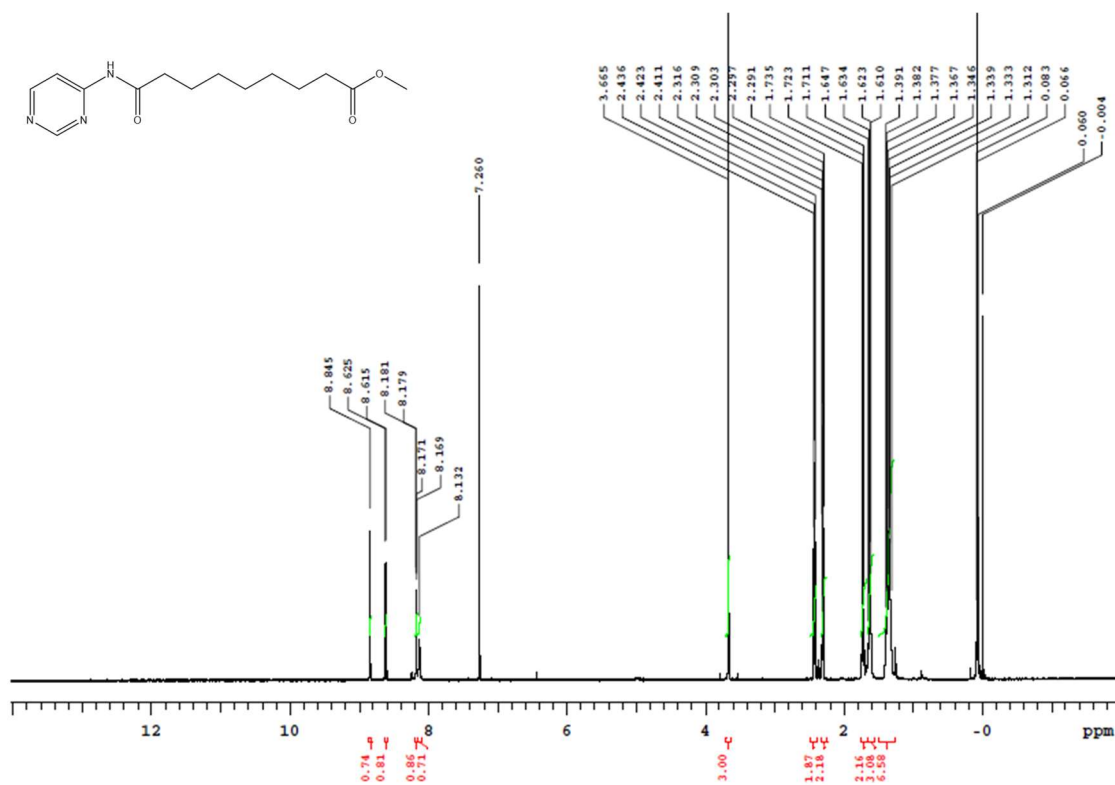

**Figure S13.** <sup>1</sup>H NMR spectrum (CDCl<sub>3</sub>, 600 MHz) of compound 5b



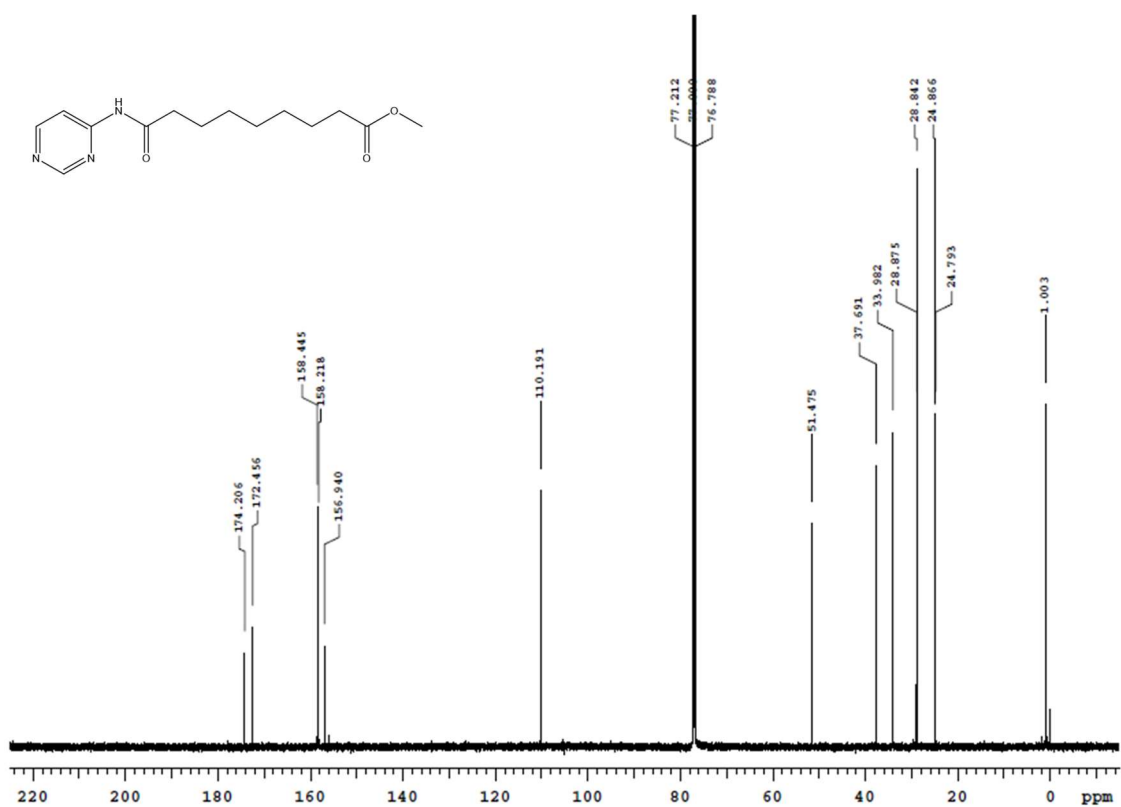

**Figure S14.**  $^{13}\text{C}$ NMR spectrum ( $\text{CDCl}_3$ , 150 MHz) of compound **5b**

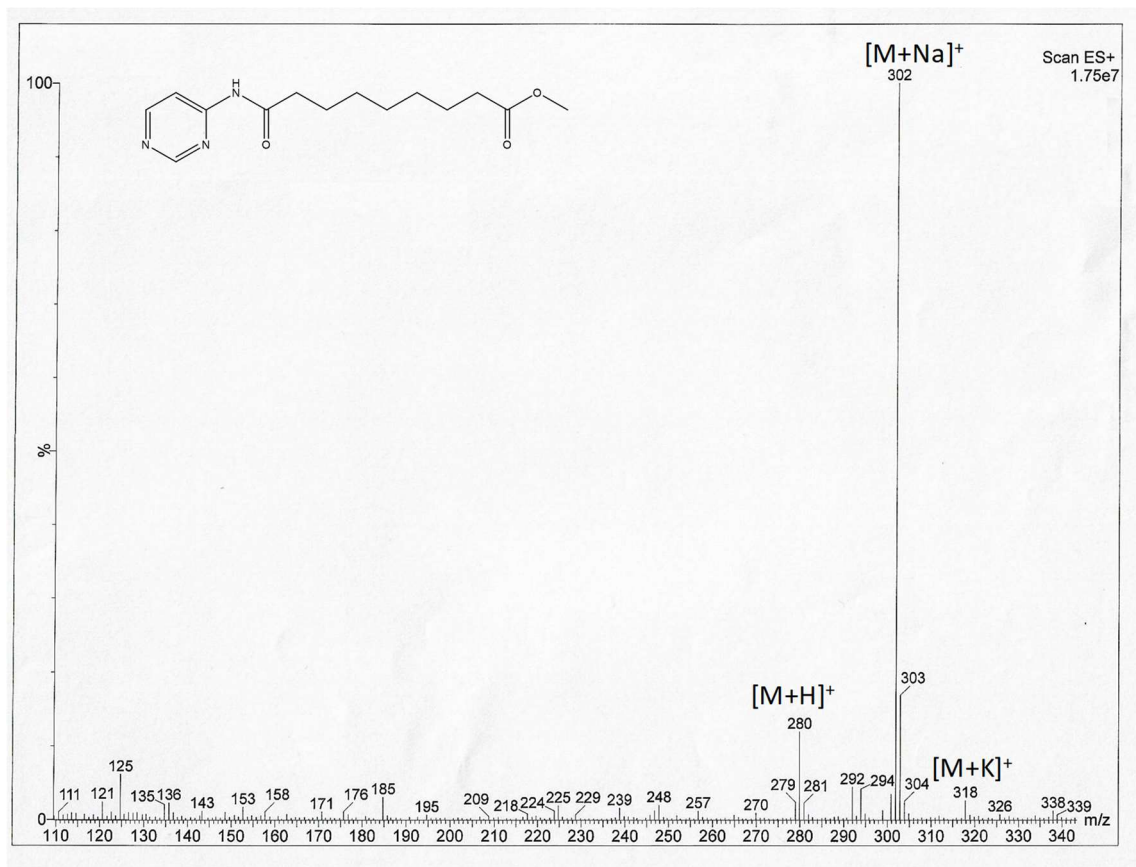

**Figure S15.** ESI-MS $^+$  spectrum of compound **5b**



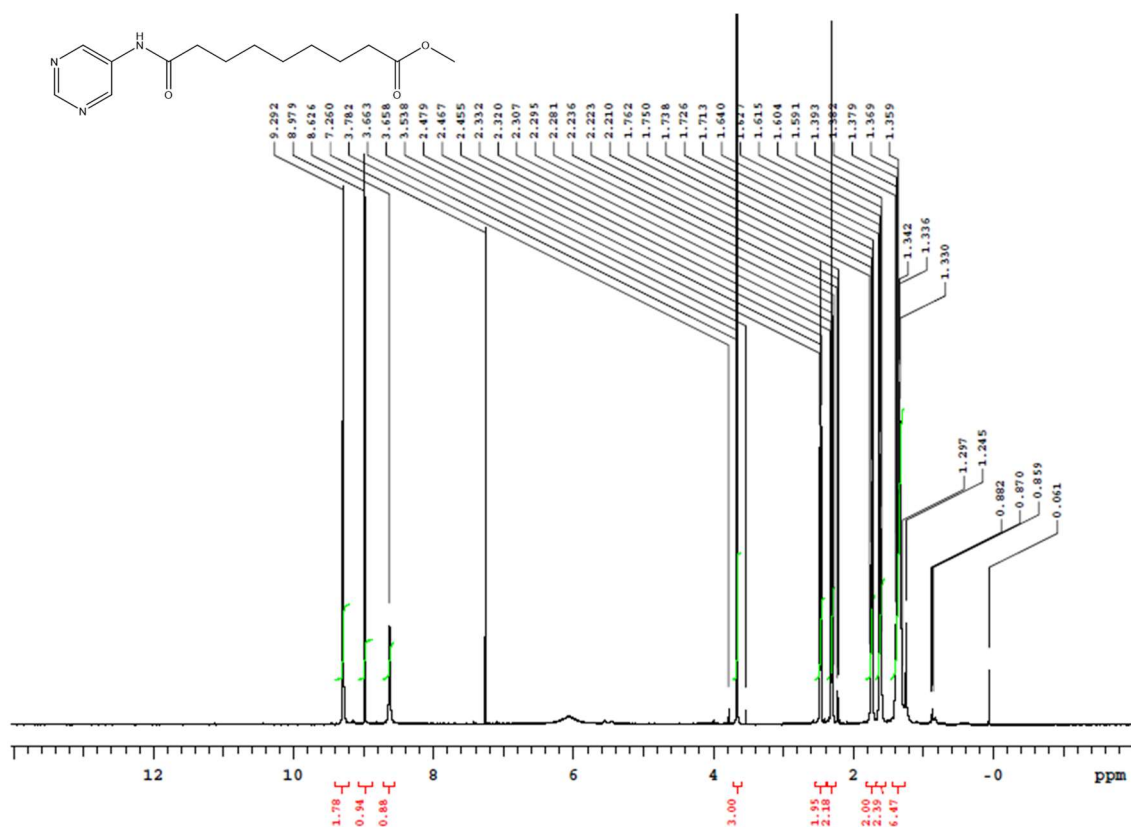

Figure S16. <sup>1</sup>H NMR spectrum (CDCl<sub>3</sub>, 600 MHz) of compound 5c

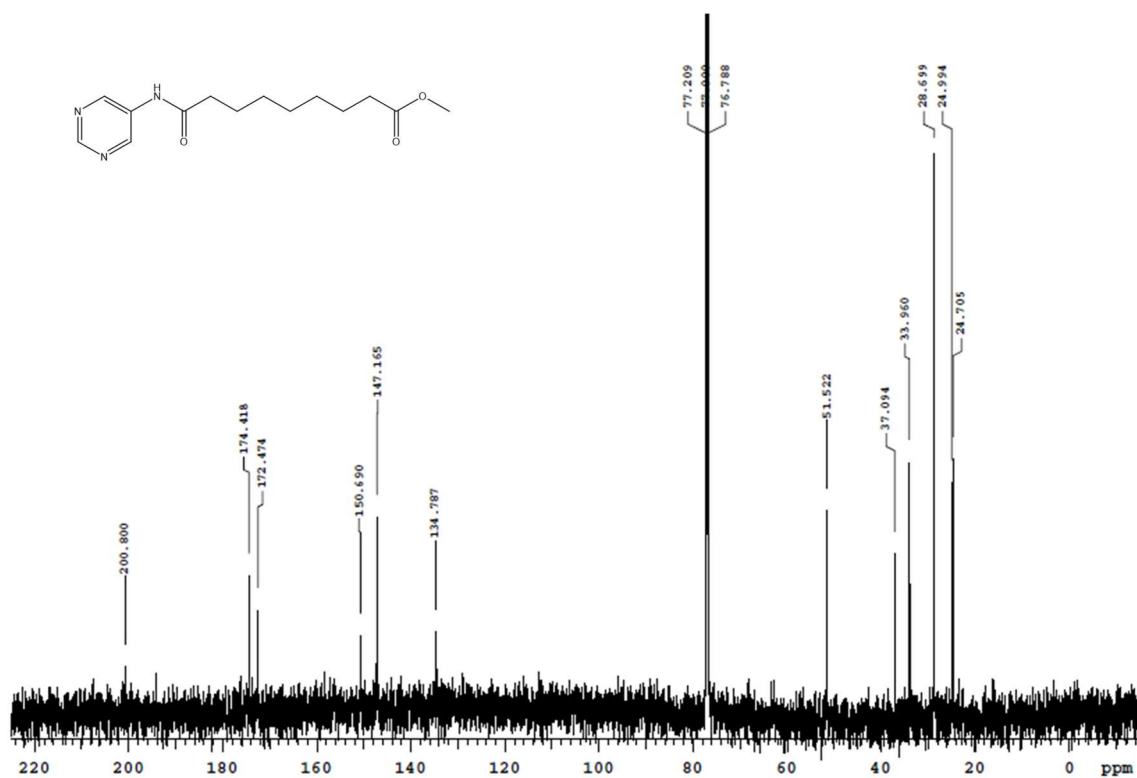

Figure S17. <sup>13</sup>C NMR spectrum (CDCl<sub>3</sub>, 150 MHz) of compound 5c

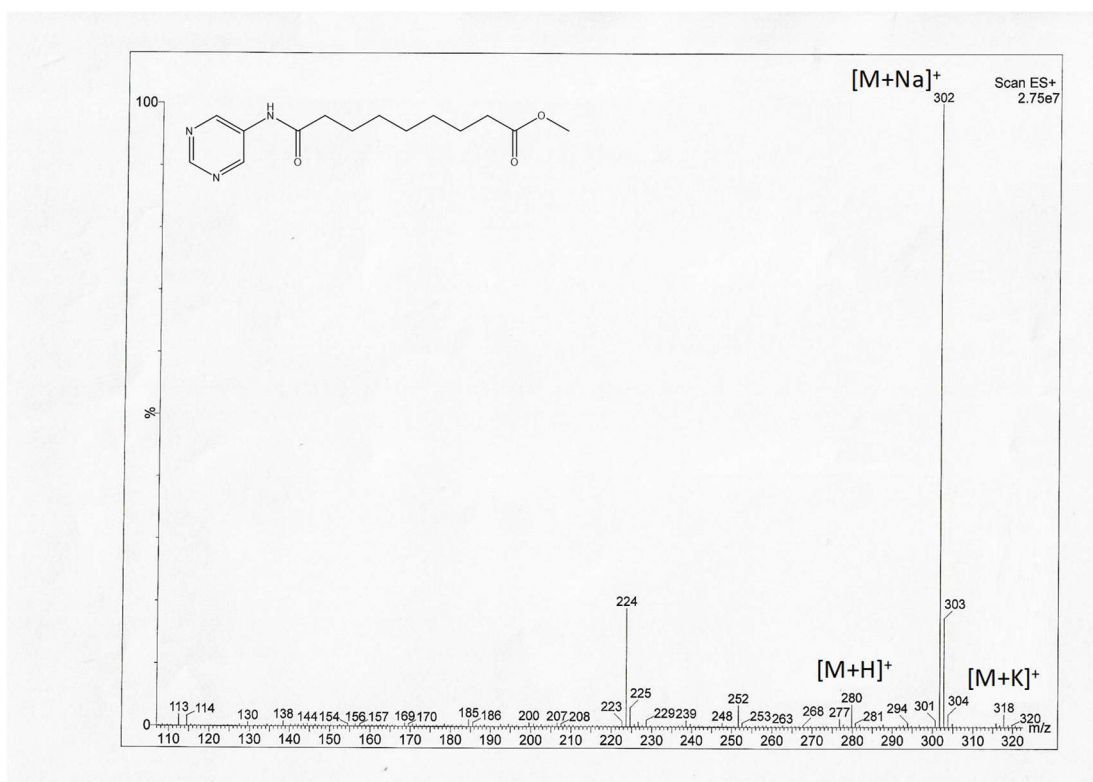

**Figure S18.** ESI-MS<sup>+</sup> spectrum of compound 5c

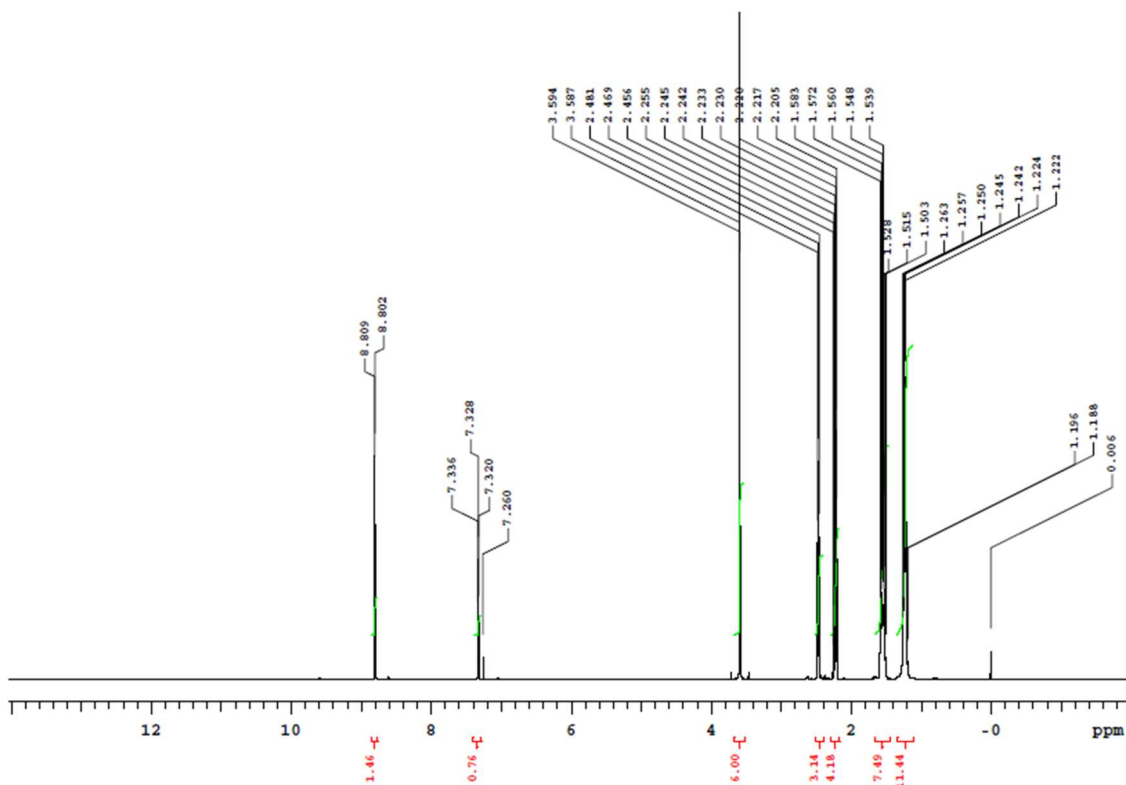

**Figure S19.** <sup>1</sup>H NMR spectrum (CDCl<sub>3</sub>, 600 MHz) of compound 6

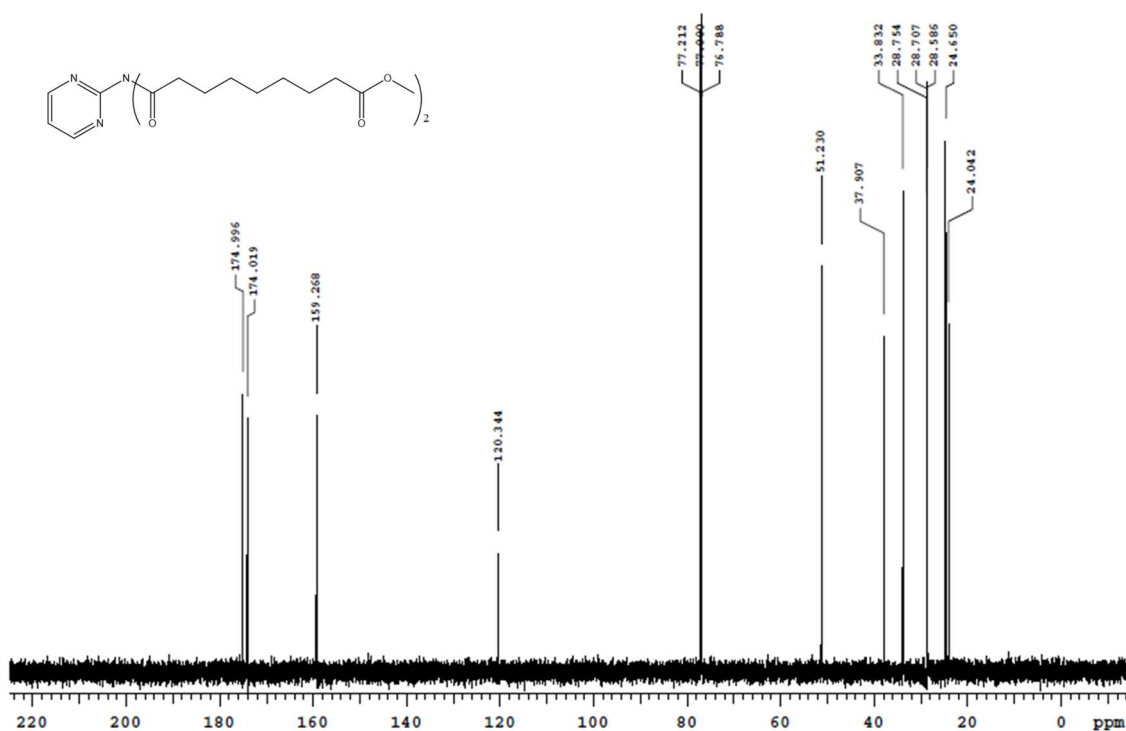

Figure S20. <sup>13</sup>C NMR spectrum (CDCl<sub>3</sub>, 150 MHz) of compound 6

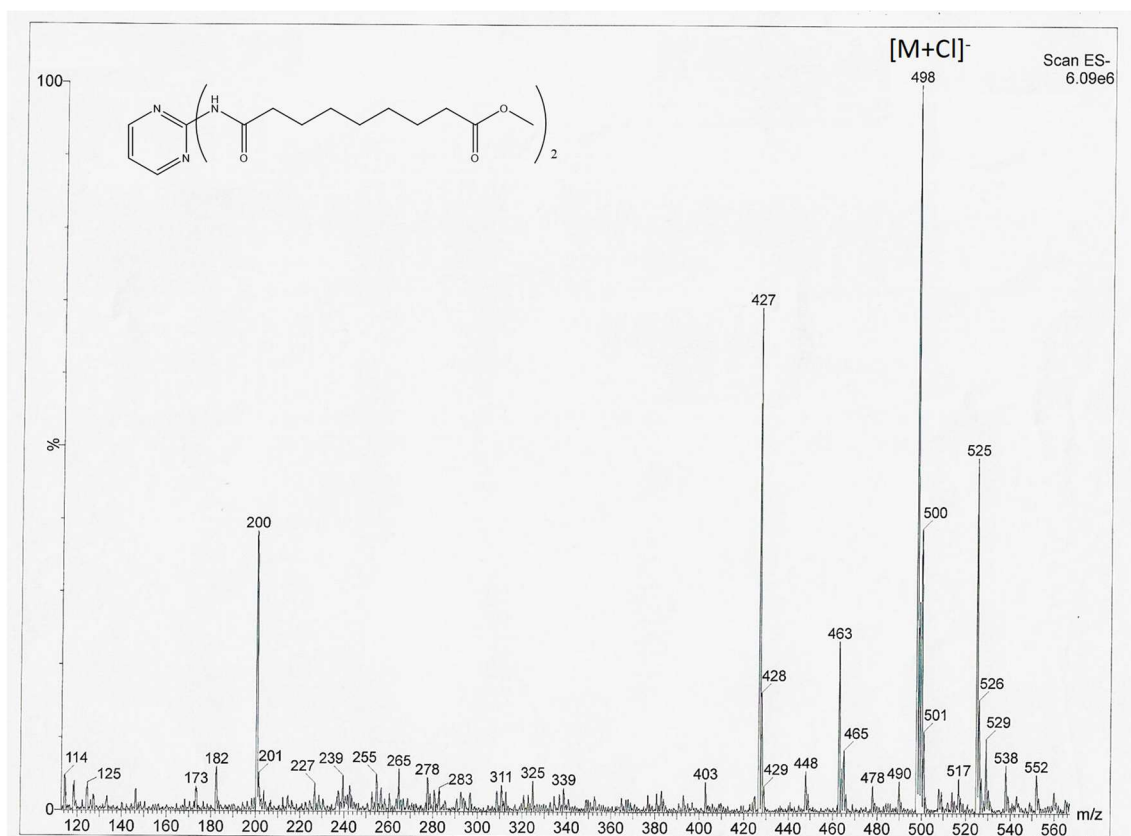

Figure S21. ESI-MS<sup>-</sup> spectrum of compound 6

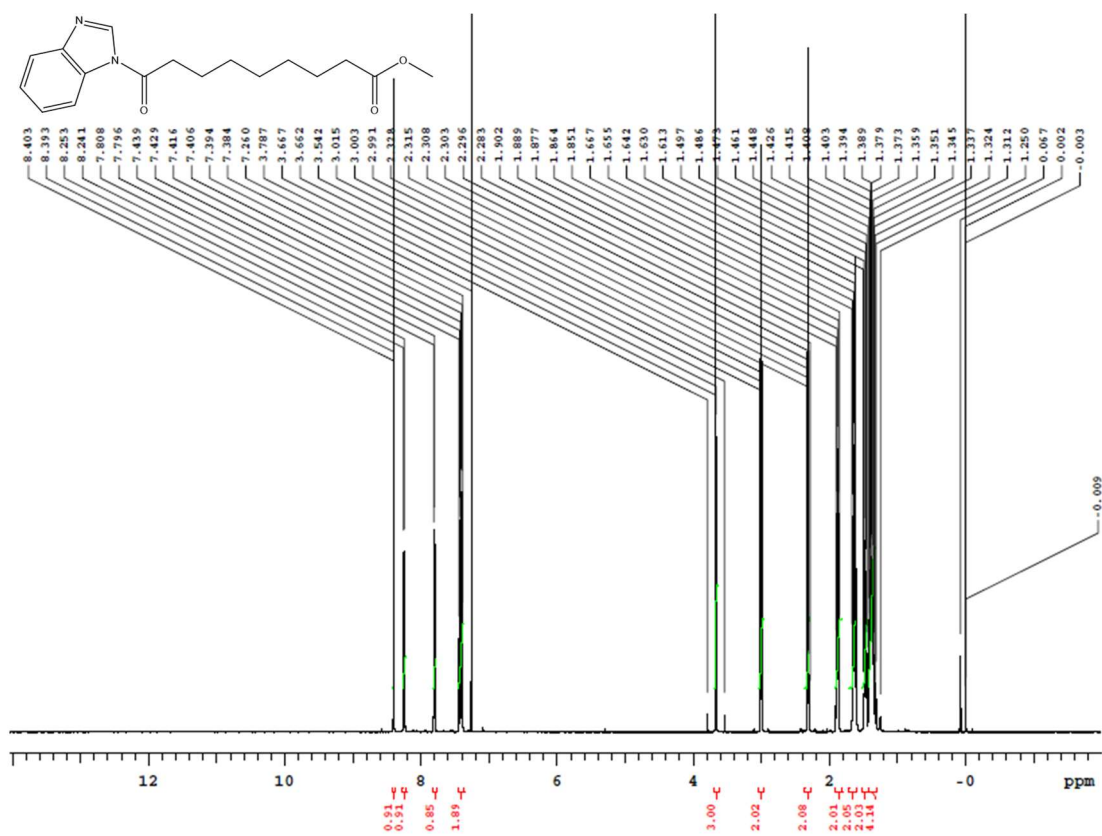

Figure S22. <sup>1</sup>H NMR spectrum (CDCl<sub>3</sub>, 600 MHz) of compound 8a

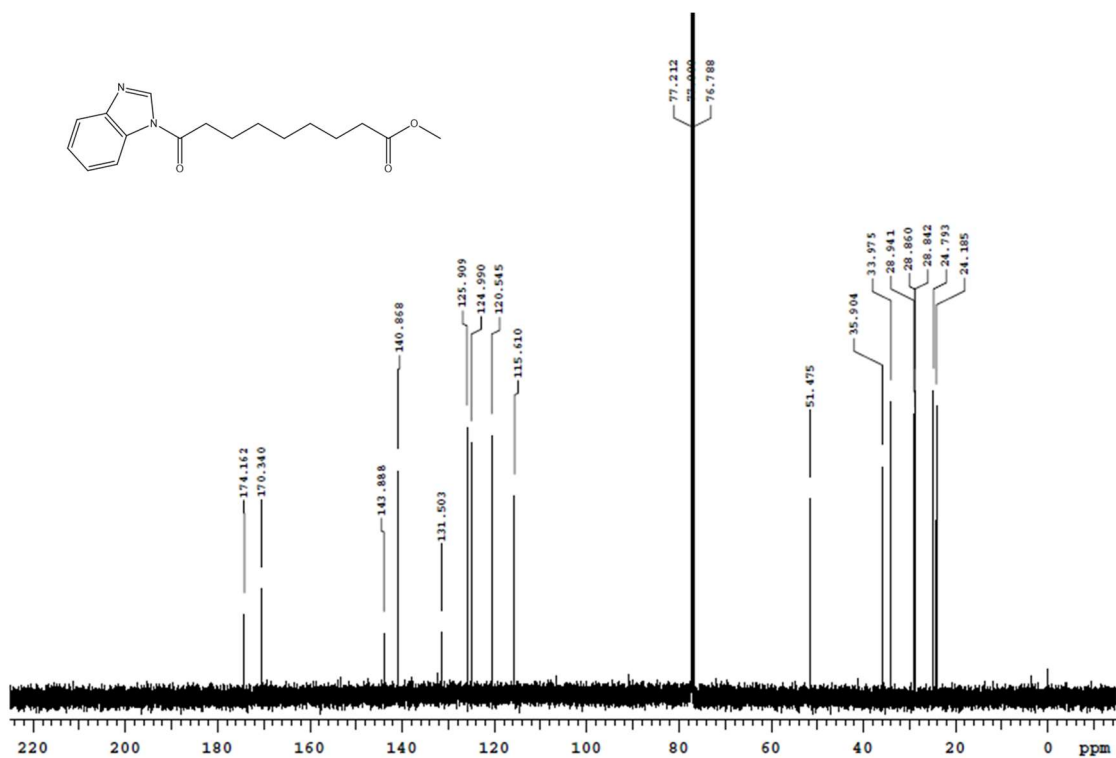

Figure S23. <sup>13</sup>C NMR spectrum (CDCl<sub>3</sub>, 150 MHz) of compound 8a

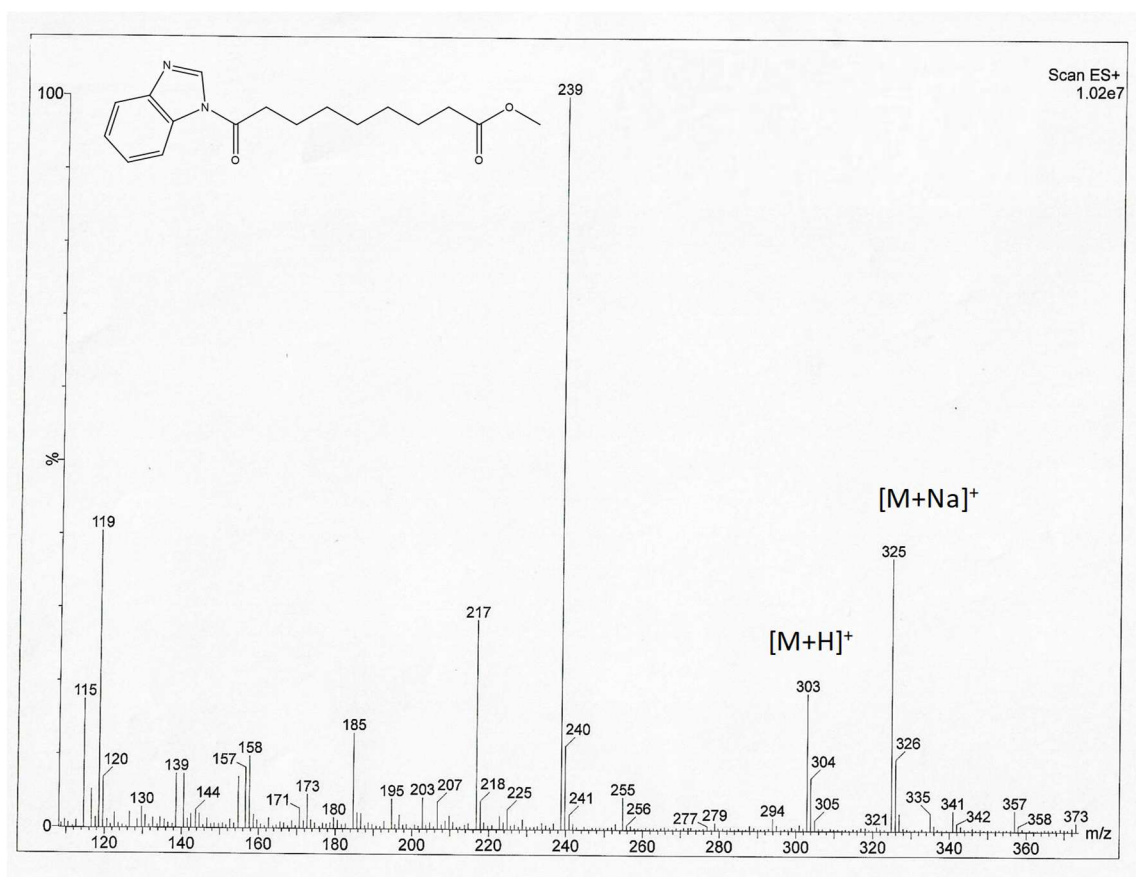

Figure S24. ESI-MS<sup>+</sup> spectrum of compound 8a

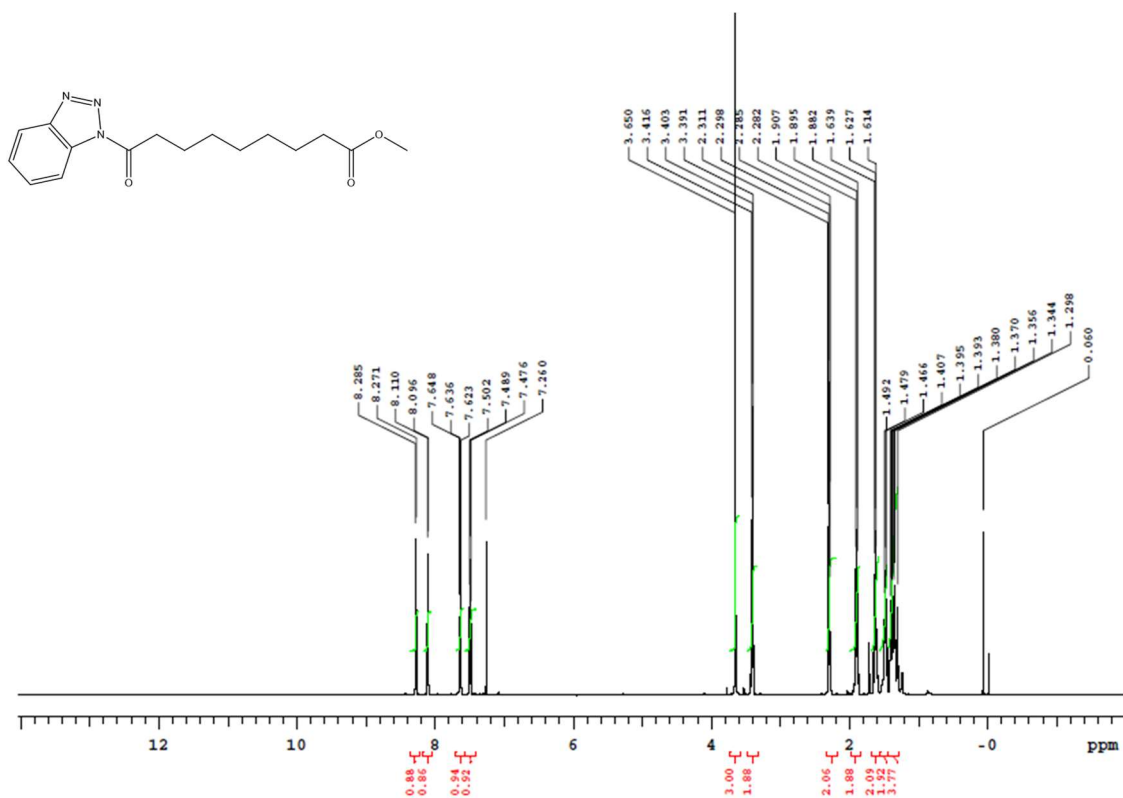

Figure S25. <sup>1</sup>H NMR spectrum (CDCl<sub>3</sub>, 600 MHz) of compound 8b

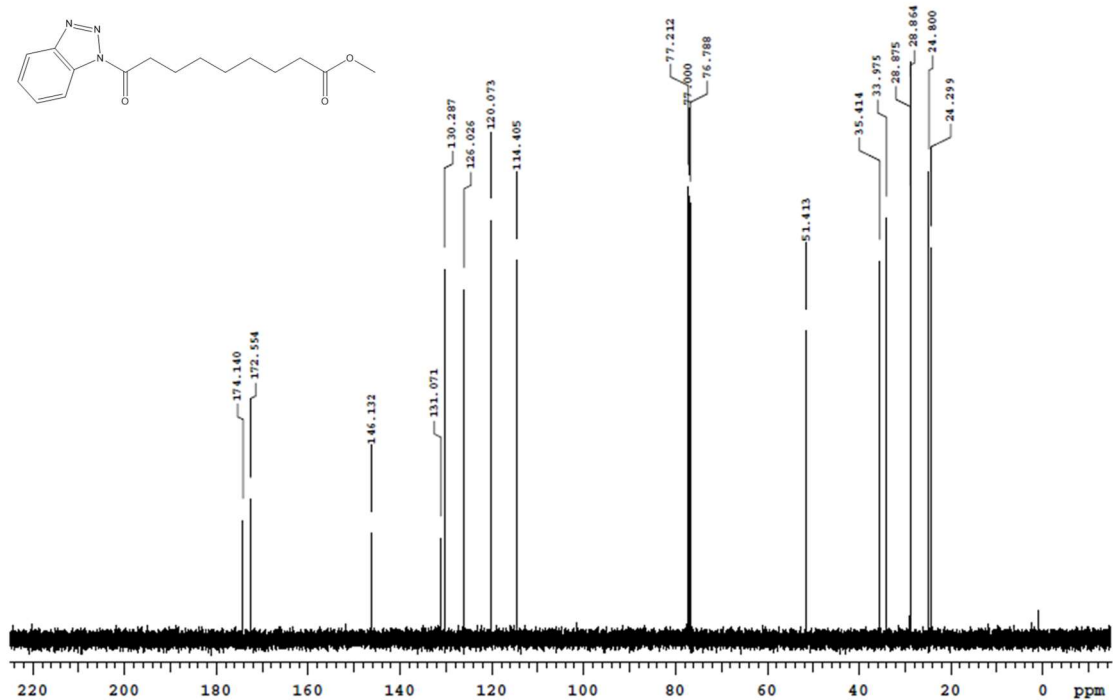

**Figure S26.** <sup>13</sup>CNMR spectrum (CDCl<sub>3</sub>, 150 MHz) of compound **8b**

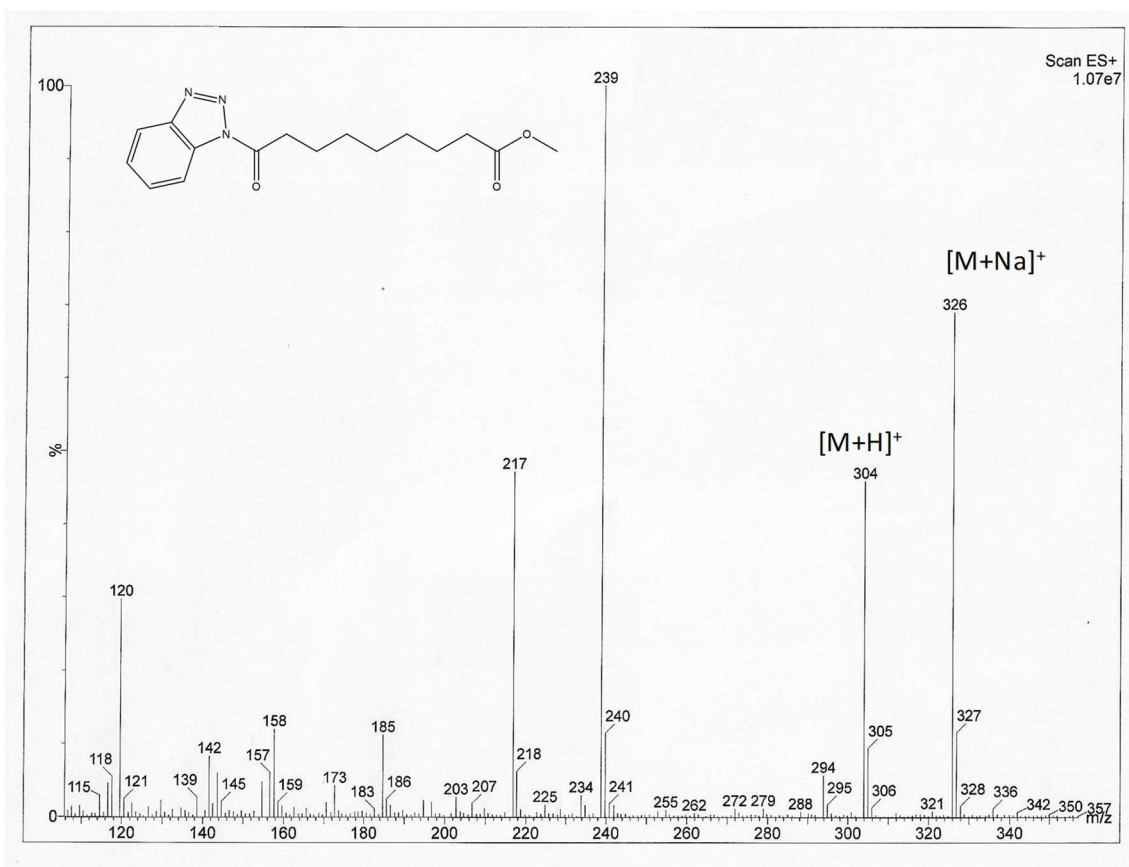

**Figure S27.** ESI-MS<sup>+</sup> spectrum of compound **8b**



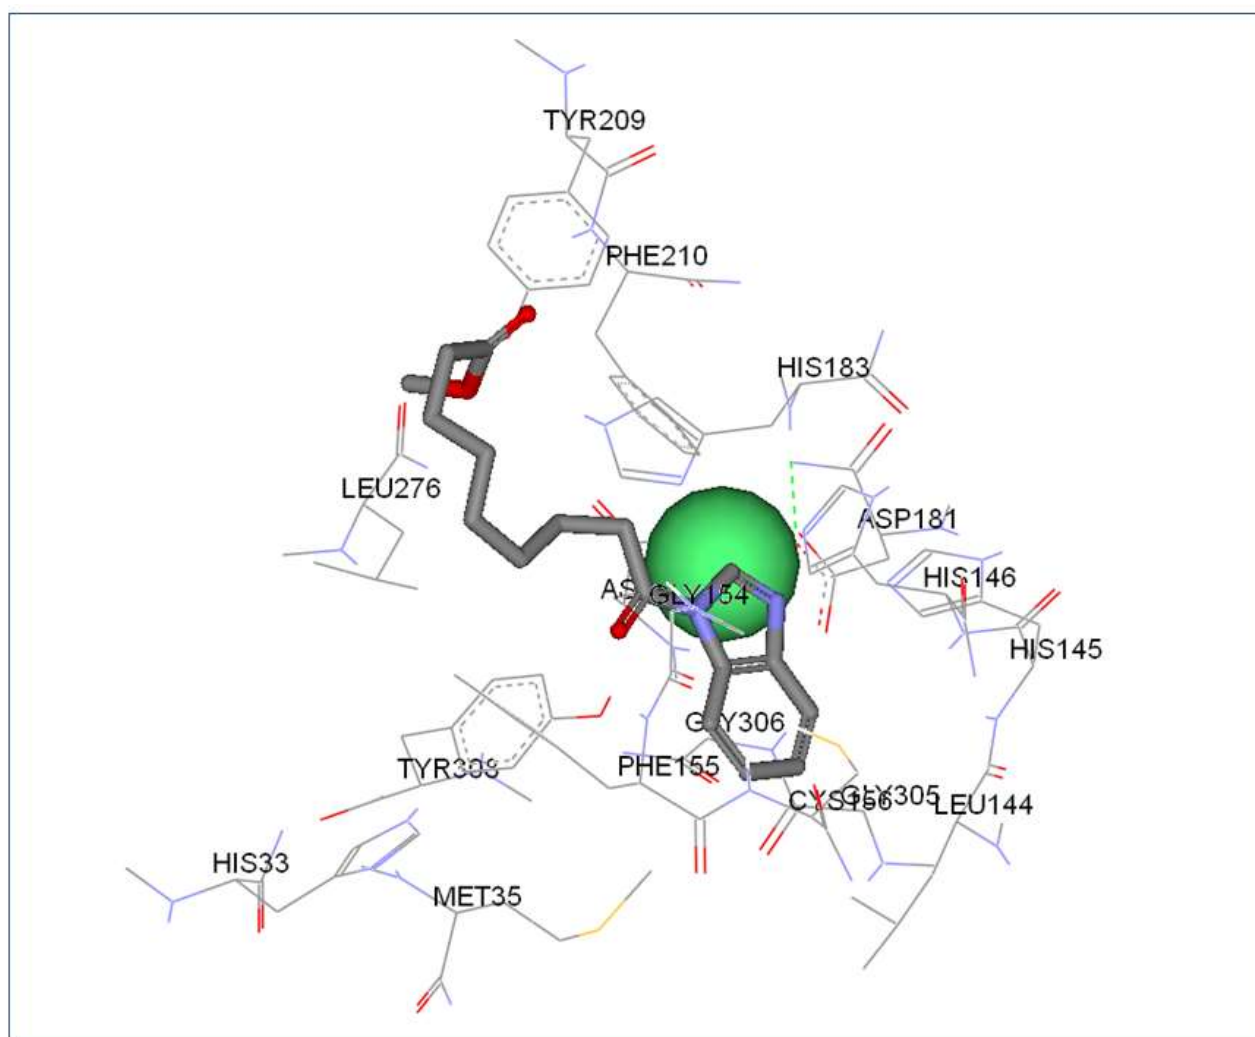

**Figure S28.** Docking poses of compound **8a** into the binding site of HDAC2 structure (PDB ID: 4LXZ)

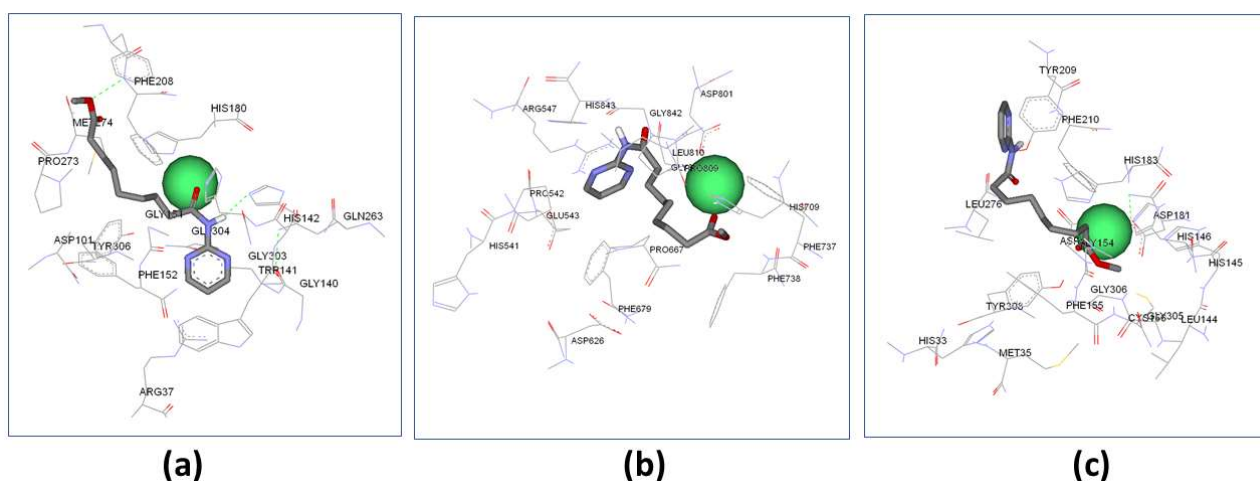

**Figure S29.** Docking poses of compound **5a** into the binding site of: (a) HDAC8 structure (PDB ID: 4QA3); (b) HDAC7 structure (PDB ID: 3C0Z) and (c): HDAC2 structure (PDB ID: 4LXZ), respectively. In both pictures zinc ion is represented as green sphere.



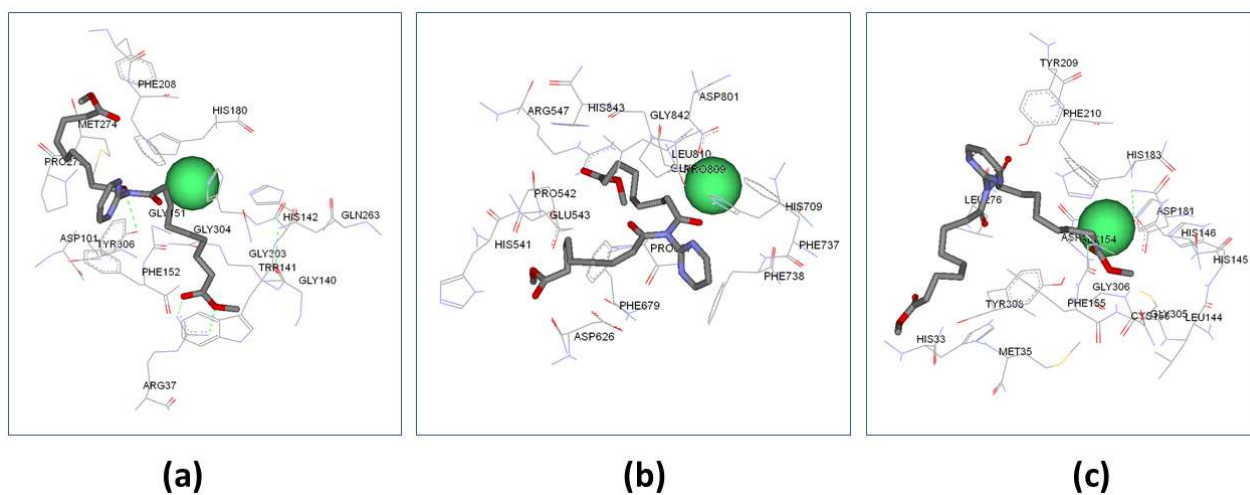

**Figure S30.** Docking poses of compound **6** into the binding site of: (a) HDAC8 structure (PDB ID: 4QA3); (b) HDAC7 structure (PDB ID: 3C0Z) and (c): HDAC2 structure (PDB ID: 4LXZ), respectively. In both pictures zinc ion is represented as green sphere.

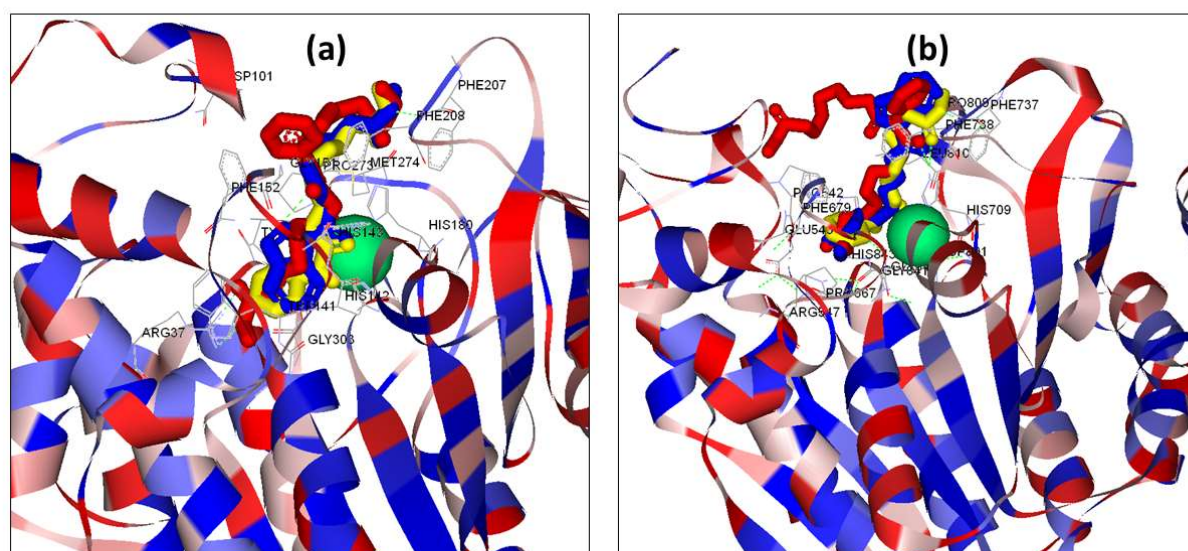

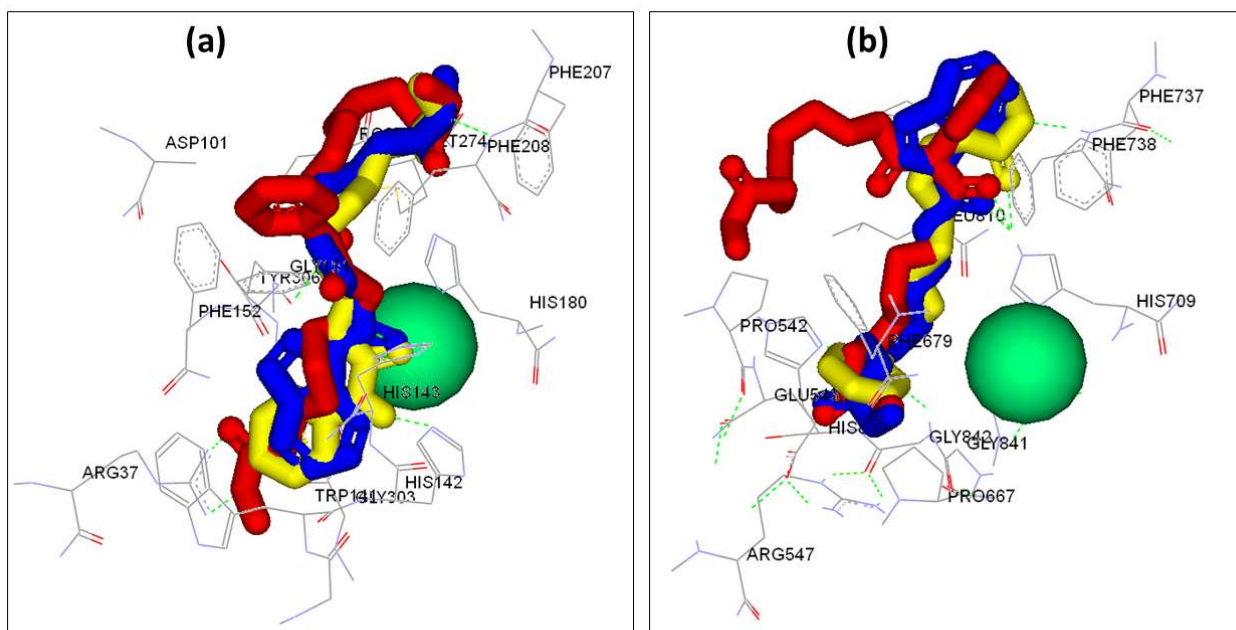

**Figure S31:** docking pose for all the evaluated compounds into the HDAC8 and HDAC7 active binding sites in two different representations modes (top and bottom). **(a):** Docking poses of compounds **5a** (yellow), **6** (red) and **8a** (blue) in the binding site of HDAC8 structure (PDB ID: 4QA3). Hydrogen bonds and zinc ion are represented as green dash line and green sphere, respectively. **(b):** Docking poses of compounds **5a** (yellow), **6** (red) and **8a** (blue) in the binding site of HDAC7 structure (PDB ID: 3C0Z). Hydrogen bonds and zinc ion are represented as green dash line and green sphere, respectively.

**Table S1.** Hydrogen bonds and virtual interactions within 5 Å between compound **5a**, **6**, and **8a** and aminoacid residues (and zinc ion) into the binding site of HDAC8 structure (PDB ID: 4QA3) obtained from docking evaluation.

| HDAC8-4QA3 aminoacidic residues in the active site                                      | 5a                                 | 6                                                    | 8a                            |
|-----------------------------------------------------------------------------------------|------------------------------------|------------------------------------------------------|-------------------------------|
| ARG37 (positively charged) $(-(\text{CH}_2)_3\text{-NH-C}(-\text{NH}_2)=\text{NH}_2^+)$ |                                    | near to $-\text{COOCH}_3$ group belonging to chain a |                               |
| ASP101 negatively charged $(-\text{COO}^-)$                                             |                                    | near to pyrimidinyl ring                             |                               |
| GLY140                                                                                  | near to pyrimidinyl ring           |                                                      | near to benzimidazolyl moiety |
| TRP141                                                                                  | near to pyrimidinyl ring           | near to $-\text{COOCH}_3$ group belonging to chain a | near to benzimidazolyl moiety |
| HIS142                                                                                  | near to oxygen atom of amide group |                                                      | near to benzimidazolyl moiety |
| HIS143                                                                                  | near to oxygen atom of amide group |                                                      | near to benzimidazolyl moiety |
| GLY151                                                                                  |                                    | near to amide C=O group belonging to chain a         |                               |
| PHE152                                                                                  |                                    | near to pyrimidinyl ring                             |                               |

| <b>HIS180</b> | <b>H bond with amidic C=O</b>      | <b>H bond with amidic C=O</b>                         | <b>H bond with amidic C=O</b>      |
|---------------|------------------------------------|-------------------------------------------------------|------------------------------------|
| PHE207        | near to COOCH <sub>3</sub> group   | near to COOCH <sub>3</sub> group belonging to chain b | near to COOCH <sub>3</sub> group   |
| PHE208        | near to COOCH <sub>3</sub> group   | near to pyrimidinyl ring                              | near to COOCH <sub>3</sub> group   |
| PRO273        | near to COOCH <sub>3</sub> group   | near to COOCH <sub>3</sub> group belonging to chain b | near to COOCH <sub>3</sub> group   |
| MET274        |                                    | near to COOCH <sub>3</sub> group belonging to chain b |                                    |
| GLY303        | near to pyrimidinyl ring           | near to COOCH <sub>3</sub> group belonging to chain a | near to benzimidazolyl moiety      |
| GLY304        | near to pyrimidinyl ring           | near to COOCH <sub>3</sub> group belonging to chain a | near to benzimidazolyl moiety      |
| <b>TYR306</b> | near to amide carbonyl             | <b>H bond with amidic C=O</b>                         | near to benzimidazolyl moiety      |
| Zn 502        | near to oxygen atom of amide group | near to oxygen atom of amide group                    | near to oxygen atom of amide group |

**Table S2.** Hydrogen bonds and virtual interactions within 5 Å between compound **5a**, **6**, and **8a** and aminoacid residues (and zinc ion) into the binding site of HDAC7 structure (PDB ID: 3C0Z) obtained from docking evaluation.

| <b>HDAC7-3C0Z aminoacid residues in the active site</b>                                                               | <b>5a</b>                        | <b>6<sup>a</sup></b>                                        | <b>8a</b>                        |
|-----------------------------------------------------------------------------------------------------------------------|----------------------------------|-------------------------------------------------------------|----------------------------------|
| PRO542                                                                                                                | near to pyrimidinyl ring         | near to COOCH <sub>3</sub> group belonging to chain a       |                                  |
| GLU543 negatively charged (-CH <sub>2</sub> COO <sup>-</sup> )                                                        | near to pyrimidinyl ring         | near to COOCH <sub>3</sub> group belonging to chain a       | near to COOCH <sub>3</sub> group |
| ARG547 (positively charged) (-(CH <sub>2</sub> ) <sub>3</sub> -NH-C(-NH <sub>2</sub> )=NH <sub>2</sub> <sup>+</sup> ) |                                  | near to COOCH <sub>3</sub> group belonging to chain a       | near to COOCH <sub>3</sub> group |
| PRO667                                                                                                                |                                  |                                                             | near to COOCH <sub>3</sub> group |
| PHE679                                                                                                                | near to aliphatic chain          | near to aliphatic chain a                                   | near to aliphatic chain          |
| <b>HIS709</b>                                                                                                         | <b>H bond with amidic C=O</b>    | <b>H bond with amidic C=O belonging to chain a</b>          | <b>H bond with amidic C=O</b>    |
| PHE737                                                                                                                | near to COOCH <sub>3</sub> group |                                                             | near to benzimidazolyl moiety    |
| <b>PHE738</b>                                                                                                         | <b>H bond with ester C=O</b>     | near to pyrimidinyl ring and the amidic carbonyl of chain a | near to benzimidazolyl moiety    |
| ASP801 negatively charged (-COO <sup>-</sup> )                                                                        | near to pyrimidinyl ring         |                                                             |                                  |
| HIS806                                                                                                                | near to pyrimidinyl ring         |                                                             |                                  |

|        |                                    |                                                       |                                    |
|--------|------------------------------------|-------------------------------------------------------|------------------------------------|
| PRO809 | near to COOCH <sub>3</sub> group   | near to pyrimidinyl ring                              | near to benzimidazolyl moiety      |
| LEU810 |                                    | near to pyrimidinyl ring                              | near to benzimidazolyl moiety      |
| GLY841 |                                    | near to COOCH <sub>3</sub> group belonging to chain a | near to COOCH <sub>3</sub> group   |
| GLY842 | near to pyrimidinyl ring           |                                                       | near to COOCH <sub>3</sub> group   |
| HIS843 | near to pyrimidinyl ring           | near to aliphatic chain a                             | near to aliphatic chain            |
| ZN101  | near to oxygen atom of ester group | near to oxygen atom of amide group                    | near to oxygen atom of amide group |

- a. Virtual interactions within 5 Å of chain b with: ASP626 (amidic C=O), HIS541, PRO273, and MET274 (COOCH<sub>3</sub> group)

**Table S3.** Hydrogen bonds and virtual interactions within 5 Å between compound **5a**, **6**, and **8a** and aminoacid residues (and zinc ion) into the binding site of HDAC2-4LXZ (PDB ID: 4LXZ) obtained from docking evaluation.

| <b>HDAC2-4LXZ aminoacid residues in the active site</b> | <b>5a</b>                        | <b>6</b>                                      | <b>8a</b>                        |
|---------------------------------------------------------|----------------------------------|-----------------------------------------------|----------------------------------|
| ASP04                                                   |                                  | near to oxygen atom of amide group of chain a |                                  |
| HIS33                                                   |                                  | near to COOCH <sub>3</sub> group of chain a   |                                  |
| PRO34                                                   |                                  | near to COOCH <sub>3</sub> group of chain a   |                                  |
| MET35                                                   |                                  |                                               | near to benzimidazolyl ring      |
| LEU144                                                  |                                  |                                               | near to benzimidazolyl ring      |
| HIS145                                                  | near to COOCH <sub>3</sub> group | near to COOCH <sub>3</sub> group of chain a   | near to benzimidazolyl ring      |
| HIS146                                                  | near to COOCH <sub>3</sub> group | near to COOCH <sub>3</sub> group of chain a   | near to benzimidazolyl ring      |
| GLY154                                                  | near to COOCH <sub>3</sub> group | near to COOCH <sub>3</sub> group of chain a   | near to benzimidazolyl ring      |
| PHE155                                                  |                                  | near to aliphatic chain a                     | near to COOCH <sub>3</sub> group |
| CYS156                                                  |                                  |                                               | near to benzimidazolyl ring      |
| ASP181                                                  |                                  |                                               | near to benzimidazolyl ring      |
| <b>HIS183</b>                                           | <b>H bond with amidic C=O</b>    | near to aliphatic chain a                     | <b>H bond with ester C=O</b>     |
| TYR209                                                  | near to pyrimidinyl ring         |                                               |                                  |
| PHE210                                                  | near to amide C=O                | near to pyrimidinyl ring                      | <b>H bond with ester C=O</b>     |
| ASP269                                                  | near to COOCH <sub>3</sub> group | near to COOCH <sub>3</sub> group of chain b   |                                  |

|               |                                  |                                             |                                               |
|---------------|----------------------------------|---------------------------------------------|-----------------------------------------------|
| LEU276        | near to aliphatic chain          | near to COOCH <sub>3</sub> group of chain b | near to benzimidazolyl ring                   |
| GLY305        |                                  |                                             | near to benzimidazolyl ring                   |
| GLY306        |                                  | near to COOCH <sub>3</sub> group of chain b | near to benzimidazolyl ring                   |
| <b>TYR308</b> | <b>H bond with ester C=O</b>     | <b>H bond with ester C=O</b>                |                                               |
| Zn 401        | near to COOCH <sub>3</sub> group | near to COOCH <sub>3</sub> group            | near to nitrogen atoms of benzimidazolyl ring |
